1 **4D live-cell imaging of microgametogenesis in the human malaria**  
2 **parasite *Plasmodium falciparum***

3 Sabrina Yahiya<sup>1</sup>, Sarah Jordan<sup>1</sup>, Holly X. Smith<sup>1</sup>, David C. A. Gaboriau<sup>2</sup>, Mufuliat T.  
4 Famodimu<sup>1</sup>, Farah A. Dahalan<sup>1</sup>, Alisje Churchyard<sup>1</sup>, George W. Ashdown<sup>1,3</sup> and Jake  
5 Baum<sup>1\*</sup>

6

7 <sup>1</sup>Department of Life Sciences and <sup>2</sup>Facility for Imaging by Light Microscopy, Imperial  
8 College London, Sir Alexander Fleming Building, Exhibition Road, South Kensington,  
9 London, SW7 2AZ, UK.

10 <sup>3</sup>Walter and Eliza Hall Institute of Medical Research, Parkville, Victoria, Australia.

11

12 **\*Correspondence to:**

13 Jake Baum ([jake.baum@imperial.ac.uk](mailto:jake.baum@imperial.ac.uk)), Department of Life Sciences, Imperial College  
14 London, Exhibition Road, South Kensington, London SW7 2AZ, United Kingdom.

15 **Key words:**

16 *Plasmodium falciparum*; microgametogenesis; exflagellation; transmission; parasite biology;  
17 time-lapse imaging; microscopy; drug discovery; drug phenotype.

18 **ABSTRACT**

19 Formation of gametes in the malaria parasite occurs in the midgut of the mosquito and is  
20 critical to onward parasite transmission. Transformation of the male gametocyte into  
21 microgametes, called microgametogenesis, is an explosive cellular event and one of the  
22 fastest eukaryotic DNA replication events known. The transformation of one  
23 microgametocyte into eight flagellated microgametes requires reorganisation of the parasite  
24 cytoskeleton, replication of the 22.9 Mb genome, axoneme formation and host erythrocyte  
25 egress, all of which occur simultaneously in <20 minutes. Whilst high-resolution imaging has  
26 been a powerful tool for defining stages of microgametogenesis, it has largely been limited to  
27 fixed parasite samples, given the speed of the process and parasite photosensitivity. Here,  
28 we have developed a live-cell fluorescence imaging workflow that captures the explosive  
29 dynamics of microgametogenesis in full. Using the most virulent human malaria parasite,  
30 *Plasmodium falciparum*, our live-cell approach combines three-dimensional imaging through  
31 time (4D imaging) and covers early microgametocyte development through to microgamete  
32 release. Combining live-cell stains for DNA, tubulin and the host erythrocyte membrane, 4D  
33 imaging enables definition of the positioning of newly replicated and segregated DNA. It also  
34 shows the microtubular cytoskeleton, location of newly formed basal bodies and elongation  
35 of axonemes, as well as behaviour of the erythrocyte membrane, including its specific  
36 perforation prior to microgamete egress. 4D imaging was additionally undertaken in the  
37 presence of known transmission-blocking inhibitors and the untested proteasomal inhibitor  
38 bortezomib. Here, for the first time we find that bortezomib inhibition results in a clear block  
39 of DNA replication, full axoneme nucleation and elongation. These data not only define a  
40 framework for understanding microgametogenesis in general but also suggest that the  
41 process is critically dependent on proteasomal activity, helping to identify potentially novel  
42 targets for transmission-blocking antimalarial drug development.

## 43 INTRODUCTION

44 Malaria disease is caused by single-cell protozoan parasites from the genus *Plasmodium*.  
45 Over its complex two-host lifecycle, the *Plasmodium* cell demonstrates remarkable cellular  
46 plasticity as it transitions between multiple developmental stages. In the transition from  
47 mammalian to mosquito host, the parasite faces an extreme population bottleneck in  
48 numbers, which also presents a natural target for novel antimalarial treatments aimed at  
49 blocking transmission. Transmission is triggered by the uptake of sexual stage gametocytes  
50 during a mosquito feed that instantly activate, initiating a transformation in the mosquito  
51 midgut that has become a trademark in the cellular biology of these protozoan parasites<sup>1</sup>.  
52 Dormant male (micro) and female (macro) gametocytes form a sub-population of between  
53 0.2-1% of the circulating asexual blood stage parasite reservoir in the mammalian host. The  
54 signals that initiate commitment of asexual parasites to sexual differentiation are, however,  
55 poorly understood<sup>1</sup>. Committed gametocytes mature over five distinct morphological stages  
56 (referred to as stages I-V) and are believed to sequester in the host bone marrow and  
57 spleen, before emerging into the bloodstream when they reach stage V maturity<sup>1-3</sup>. Following  
58 ingestion by a feeding mosquito, stage V microgametocytes and macrogametocytes  
59 transform rapidly to microgametes and macrogametes, respectively. The transformation from  
60 gametocyte to gamete, a process termed gametogenesis, is activated by a decrease in  
61 temperature to 20-25°C, rise in pH and the presence of the mosquito metabolite, xanthurenic  
62 acid in the mosquito midgut<sup>4</sup>.

63 *Plasmodium* gametogenesis is distinctly different between male and female parasites. Both  
64 entail a morphological change from falciform to rounded, in *P. falciparum*, and egress from  
65 within the host erythrocyte by an 'inside-out' mechanism. This mechanism of egress involves  
66 disintegration of the parasitophorous vacuole membrane (PVM) prior to that of the host  
67 erythrocyte<sup>5</sup>. The female macrogametocyte rounds up<sup>6</sup> and egresses<sup>7</sup> within 10 minutes of  
68 activation, emerging as a fertilisation competent macrogamete. Whilst this process is  
69 incompletely understood, reverse genetic studies using different *Plasmodium* species have

70 described some key female specific events underlying macrogametogenesis<sup>8-12</sup>, such as  
71 release of osmiophillic bodies, membrane-bound organelles which are sparse if not entirely  
72 absent in microgametocytes<sup>13</sup>. Whilst females become fertilisation-competent upon egress  
73 and undergo little cellular reorganisation beyond rounding, microgametogenesis is  
74 notoriously complex, and is the focus of our study here.

75 Microgametogenesis has been most extensively studied by electron microscopy (EM)  
76 investigation of the rodent malaria parasite, *P. berghei* and *P. yoelii*.<sup>14-16</sup> The detailed EM  
77 work has revealed that microgamete formation entails a stepwise series of events including:  
78 substantial cytoskeletal rearrangement, three rounds of DNA replication, alternating with  
79 three rounds of endomitotic division, all of which occurs in ~15-20 minutes. *P. falciparum*  
80 gametocytes start as falciform, a characteristic from which the species derives its name<sup>2,3</sup>,  
81 before morphologically transforming to round once activated. Upon activation, a single  
82 microtubule organising centre (MTOC) has been shown to transform into two orthogonal  
83 tetrads of basal bodies attached to a spindle pole. The resulting eight basal bodies, from  
84 which eight axonemes nucleate and elongate, segregate with each endomitotic  
85 division<sup>15,17,18</sup>. Axoneme assembly occurs, fuelled by the large quantities of tubulin within  
86 mature microgametocyte that rapidly polymerises to form microtubules<sup>19</sup>. Prior to activation,  
87 the MTOC starts in close alignment with the nuclear pore, permitting each basal body to pull  
88 a haploid genome (1n) from the newly replicated octoploid (8n) genome through the parental  
89 cell body at the point of emergence<sup>15</sup>. This dynamic process by which developing haploid  
90 microgametes emerge as motile flagellar is a process termed exflagellation and occurs from  
91 ~15 minutes post-activation<sup>17</sup>. Motile haploid microgametes then fuse with the sessile  
92 macrogamete, producing a motile zygote able to migrate to the midgut epithelium for oocyst  
93 formation and onwards progression in the mosquito<sup>20</sup>.

94 Current insights into the processes of male and female gametogenesis have taken  
95 advantage of the high temporal and spatial resolution offered by brightfield and fluorescence  
96 imaging, respectively<sup>21,22</sup>. However, microtubules are not easily resolvable by brightfield and

97 the specificity of fluorescent imaging often requires antibody staining, limiting imaging to  
98 fixed samples. This is also true for electron microscopy, despite its proven utility in shaping  
99 our current understanding of the fine cellular biology of microgametogenesis<sup>14,15,23</sup>. As a  
100 result, the dynamic nature of events encompassing microgametogenesis are still very poorly  
101 understood. Better temporal characterisation using live samples, coupled with the specificity  
102 of fluorescently tagged structures would allow a marked improvement in our understanding  
103 of the process of microgametogenesis and provide a platform from which strategies to block  
104 it might then be translatable.

105 Low and high-resolution microscopy of *Plasmodium* has been extensively used to  
106 understand the cell biology of parasite development and aid drug-intervention studies.  
107 Ultrastructure expansion microscopy was recently shown to advance traditional fluorescence  
108 microscopy approaches to fixed parasite imaging, allowing close observation of asexual  
109 blood stage, microgametocyte and ookinete cytoskeletal development<sup>22</sup>. A recent study  
110 reported the application of semi-supervised machine learning to define asexual parasite  
111 development in a high-throughput imaging format, using fixed parasites<sup>24</sup>. The study proved  
112 to be a powerful tool in detecting parasites with morphological perturbations when treated  
113 with known antimalarials<sup>24</sup>. Another recent high throughput screen reported the phenotypes  
114 of transmission blocking antimalarial hits with unknown cellular targets<sup>25</sup>. The study utilised  
115 immunofluorescence labelling of fixed parasites undergoing microgametogenesis to  
116 manually define cellular phenotypes. The same screen utilised low-resolution, live brightfield  
117 imaging of exflagellation in a high-throughput assay<sup>21</sup> to identify the microgametogenesis-  
118 blocking hits<sup>25</sup>. Live-cell fluorescence microscopy has also been explored, with a recent  
119 study utilising lattice light-sheet microscopy to acquire 3D live time-lapse data of asexual *P.*  
120 *falciparum* invasion<sup>26</sup>. Other studies have reported the use of live-cell fluorescence imaging  
121 of microgametogenesis to define the phenotypes of transgenic *P. berghei*<sup>27,28</sup> cell lines.  
122 Given the error prone nature of microgametogenesis<sup>16</sup>, however, it is important to define true

123 perturbations to microgametogenesis over natural variation and, critically, to do so in real  
124 time.

125 Here, we describe a protocol that enables the labelling of microtubules, DNA and host  
126 erythrocyte membrane for *P. falciparum* microgametocytes and their imaging by live-cell 3D  
127 fluorescence microscopy (4D imaging), capturing the entire process of microgametogenesis.  
128 To develop a workflow that is translatable to other research labs, we have used a  
129 combination of widefield microscopy, an open-source analysis software for deconvolution  
130 and commercially available reagents throughout this study. Using this approach, we define in  
131 detail the dynamic morphological transformations that occur during microgametogenesis,  
132 from activation through to exflagellation. Furthermore, we demonstrate the applicability of  
133 our protocol to phenotypic characterisation of inhibitors of microgametogenesis, in particular  
134 the role of the proteasome, demonstrating the power of this approach for future  
135 transmission-blocking drug discovery<sup>24</sup>.

## 136 RESULTS

### 137 Development of a live microgametogenesis 4D imaging approach

138 To date, visualisation of the complex cytoskeletal rearrangement, host erythrocyte egress  
139 and DNA replication events during *P. falciparum* microgametogenesis (**Figure 1A**) has  
140 mostly been limited to fixed imaging protocols. We set out to devise a live cell imaging  
141 workflow (**Figure 1B**) that permits observation of cellular dynamics during  
142 microgametogenesis in real-time and in three dimensions (4D imaging). Selective testing of  
143 several dyes revealed that the silicon-rhodamine (SiR) derivative SiR-tubulin, Vybrant™  
144 DyeCycle™ Violet and wheat germ agglutinin (WGA) combined to effectively stain live  
145 microgametocyte microtubules, DNA and the host erythrocyte membrane, respectively. SiR-  
146 tubulin, a non-toxic far-red fluorogenic probe<sup>29</sup>, is an SiR-derivative conjugated to  
147 docetaxel<sup>30</sup> which binds specifically to microtubules and we demonstrate its specificity and  
148 photostability in live cell fluorescence imaging of microgametogenesis. Vybrant™  
149 DyeCycle™ Violet is a cell permeable dye which binds to double-stranded DNA to emit a  
150 fluorescent signal proportional to DNA mass and has been previously used to measure  
151 microgametocyte genome replication during microgametogenesis<sup>31,32</sup> using flow cytometry.  
152 Stage V gametocytes from the *P. falciparum* NF54 strain, were cultured as previously  
153 described<sup>33</sup>, stained and strictly maintained at 37°C to prevent premature activation of  
154 gametogenesis. Gametogenesis was initiated by mimicking conditions of the mosquito  
155 midgut using “ookinete media” (see Materials and Methods), a xanthurenic-acid-containing  
156 media maintained at pH 7.4 and used at room temperature (RT). Labelled gametocytes were  
157 directly added to ookinete media-containing imaging slides and prepositioned on the  
158 microscope for the immediate acquisition of time-lapse data (**Figure 1B**).

159 To visualise the initial developmental stages of microgametogenesis, microgametocytes  
160 were identified by SiR-tubulin-stained mitotic spindles which signified a successful round of  
161 DNA replication (**Figure 1A**). Due to the rapid turnaround between activation and DNA  
162 replication, most time-lapses presented here were acquired from 1-2 minutes-post activation,

163 following a round of replication. In optimisation of the imaging workflow, we found the  
164 alternation between fluorescence and brightfield acquisition to significantly maximise the  
165 viability of microgametocytes. Following identification of an activated microgametocyte, 3-  
166 colour fluorescent time-lapses were immediately acquired before switching to brightfield  
167 microscopy. A maximum of 10 frames were acquired in fluorescence to minimise the  
168 phototoxic effects and brightfield microscopy was subsequently used to monitor parasite  
169 development. Upon observation of further parasite differentiation in brightfield, for example  
170 by rounding up or preparing for egress, image acquisition was switched back to fluorescence  
171 for further acquisition of time-lapses to capture the full early developmental stages of  
172 microgametogenesis.

173 Despite best efforts to reduce LED intensity and frame rates, phototoxicity nearly always  
174 prevented the complete visualisation of microgametogenesis from start to finish. To  
175 circumvent this issue, activated microgametocytes were imaged at different stages to ensure  
176 full capture of later developmental stages, specifically the emergence of microgametes  
177 during exflagellation (**Figure 1A**). In this late-stage instance, viable microgametocytes were  
178 identified based on SiR-tubulin-stained axonemes, coiled around the parasite cell body.  
179 Whilst the earlier stages of microgametogenesis were acquired in 4D, through Z and T,  
180 exflagellation could only be captured as single Z-slice time-lapses given the dynamic nature  
181 of emerging microgametes (**Figure 1B**). Time-lapse data of the early and later stages of  
182 microgametogenesis were subsequently combined and could be analysed together, enabling  
183 us to dissect microgametogenesis in its entirety, from initial endomitotic division through to  
184 microgamete emergence, for the first time.

185

### 186 **Insights into cytoskeletal rearrangements during microgametogenesis**

187 The formation of mitotic spindles, basal bodies and axonemes occurs with rapid succession  
188 during the early stages of microgametogenesis<sup>15,16</sup>. Using our 4D imaging platform we  
189 sought to define these stages in real time.



190 As depicted in **Figures 2A-C**, the mitotic spindle of a developing microgametocyte first  
191 formed and lengthened across the width of the parasite. Consistent with existing knowledge  
192 of microgametogenesis, mitotic spindle formation started out as a single MTOC that then  
193 transformed into two tetrads of basal bodies upon the first round of DNA replication (**Figure**  
194 **1A** and **Supplementary Video 1**). Axonemes were then seen to nucleate from each basal  
195 body and subsequently elongated, coiling around the parasite, as shown in **Figures 2A-D**  
196 and **Supplementary Videos 1-3**. As evident in the 3D data (**Figure 2D** and **Supplementary**  
197 **Video 2**), SiR-tubulin staining gathered at spindle poles whilst four axonemes were  
198 nucleated and elongated from basal bodies. We quantified the SiR-tubulin staining intensity  
199 of microgametocytes for three distinct developmental stages: microgametocytes with a fully  
200 formed spindle; newly nucleated axonemes; and developed axonemes (**Figure 2H**). A  
201 significant increase in SiR-tubulin staining was quantified across the three stages (**Figure**  
202 **2H**), representing the rapid transformation of soluble tubulin into microtubules that occurs  
203 during microgametogenesis. This finding was consistent with previous EM studies of  
204 microgametogenesis<sup>15,16</sup>. Notably, we have demonstrated the ability to retrieve and quantify  
205 volumetric data from our real-time 4D imaging approach which, prior to this study, has not  
206 been possible by EM and limited to fixed samples in immunofluorescence studies.

207 Simultaneously to cytoskeletal rearrangement, microgametocyte morphology was seen to  
208 transform from falciform to round, transforming the morphology of the host erythrocyte in the  
209 same way (**Figure 2B-CF** and **Supplementary Videos 2-3**). To identify the relationship  
210 between rounding up and microtubule polymerisation, we quantified microgametocyte cell  
211 circularity and SiR-tubulin staining intensity, respectively. Individual cells were characterised  
212 across developmental stages: microgametocytes that were falciform or had a fully developed  
213 mitotic spindle, versus those with newly nucleated axonemes or developed axonemes. We  
214 found a non-linear relationship between microgametocyte circularity and SiR-tubulin intensity  
215 (**Figure 2G**). Individual microgametocytes at the initial developmental stages of  
216 microgametogenesis showed varying levels of circularity but a similarly low level of SiR-

217 tubulin intensity. Upon reaching maximal microgametocyte circularity, cells with newly  
218 nucleated or developed axonemes showed varying SiR-tubulin intensities, which were at a  
219 higher level than the earlier developmental stages. The non-linear relationship between  
220 rounding up and microtubule polymerisation revealed that early microtubule polymerisation  
221 occurs simultaneously to rounding up and, upon fully rounding up, axonemes continue to  
222 elongate and develop (**Figure 2G**)

223

#### 224 **Microgametocyte DNA segregates and localises perpendicularly to spindle poles**

225 Incorporating the DNA dye, Vybrant™ DyeCycle™ Violet, to stain microgametocytes, we  
226 next explored the behaviour of the nucleus. Using 3D sectioned data derived from our 4D  
227 dataset, we observed nuclear segregation to occur as the microgametocyte genome was  
228 replicated (**Figure 2D** and **Supplementary Video 2**). A novel observation was made when  
229 comparing the localisation of tubulin and DNA staining, where we observed segregated DNA  
230 positioned perpendicularly to basal body tetrads (**Figure 2D, Supplementary Video 2** and  
231 **Figure 5A**). This showed that the 3D data derived can be used to make novel observations  
232 on the biology of microgametocyte DNA replication.

233 Upon full axoneme development, DNA content visibly increased (**Figure 2F**) compared to  
234 earlier stages of microgametogenesis (**Figure 2D**). When quantified, a significant increase of  
235 DNA staining from spindle formation to nucleation and development of axonemes was found  
236 (**Figure 2I**). This demonstrated that the volumetric data can be obtained using our imaging  
237 framework, permitting real-time quantification of DNA content and providing a unique window  
238 into genome replication.

239

#### 240 **The host erythrocyte perforates and forms a pore for microgametocyte egress**

241 A key stage in microgametogenesis is parasite egress from the host erythrocyte (**Figure 2C,**  
242 **E** and **Supplementary Video 3**). 4D imaging revealed that the erythrocyte membrane

243 perforated in preparation for egress (**Figure 2D** and **5A**). Activated microgametocytes  
244 aligned at the periphery of the parasite membrane, eventually ejecting from a frequently  
245 singular pore that formed in the host erythrocyte (**Figure 2E** and **Supplementary Video 3**).  
246 Notably, we observed microgametocytes eject from a spindle pole of the parasite, out of the  
247 newly formed host erythrocyte pore (**Figure 2E**, **Figures S1B-D**, **Figure 5A**, and  
248 **Supplementary Videos 3,5** and **6**). This finding suggests the mechanism of  
249 microgametocyte egress may utilise an unexplored driving force that coordinates ejection  
250 from the host cell with spindle pole positioning.

251

### 252 **Real-time fluorescence imaging of exflagellation**

253 The final steps of microgametogenesis are the emergence of haploid microgametes from the  
254 parasite cell body, the remarkably dynamic process of exflagellation. Upon full elongation,  
255 the tip of an axoneme aligns at the periphery of the parasite cell body to emerge. When  
256 emerging at ~15 minutes post-activation, the developed axoneme carries a haploid genome  
257 (1n) from the newly replicated octoploid genome (8n) through the cell surface (**Figure 1A**).  
258 Emerging microgametes could be identified either by SiR-tubulin stained axonemes or by the  
259 increased motion visible in brightfield, with the latter minimising the effects of phototoxicity.  
260 Following the initial emergence of microgametes (**Figure S2** and **Supplementary Video 7**),  
261 the full length of axonemes continued to emerge in a rapid motion (**Figure 3**). Full  
262 microgamete lengths were visualised by brightfield (**Figure 3A** and **Supplementary Video**  
263 **8-9**) and SiR-tubulin (**Figure 3B, C, E** and **Supplementary Videos 10-17**). Host erythrocyte  
264 staining during exflagellation revealed the adherence of microgametes to neighbouring  
265 erythrocytes (**Figure 3C, E** and **Supplementary Videos 15-17**). DNA staining was notably  
266 increased during exflagellation (**Figure 3C, E** and **Supplementary Videos 15-17**) compared  
267 to earlier stages of microgametogenesis (**Figure 2B-C** and **3**), signifying successful  
268 replication.

269 Due to the dynamic nature of emerging microgametes that were motile through Z-  
270 acquisition, 2D rather than 3D time-lapse data was acquired during exflagellation. Although  
271 3D frames of exflagellation were not obtained, it is possible to obtain 3D plots of SiR-tubulin  
272 intensity staining (**Figure 3D**). This allowed the identification of dense regions of SiR-tubulin  
273 staining resulting from axoneme overlap, which would otherwise not be deducible without 4D  
274 imaging (**Figure 3D**). Alternatively, as parasite motion halts during loss of viability, 3D data  
275 can be obtained to closely observe the positioning of emerged microgametes (**Figure 3E**  
276 and **Supplementary Video 17**), demonstrating about ability to acquire both 2D and 3D  
277 exflagellation time-lapse data.

278

### 279 **Drug inhibition of microgametogenesis**

280 The process of microgametogenesis is tightly synchronised by a series of cell cycle  
281 regulators and is consequently sensitive to and the target of known and developmental drug  
282 treatments<sup>25</sup>. We sought to apply our 4D imaging approach as a drug discovery tool that  
283 could help elucidate the cellular phenotypes of compounds with known and unknown activity  
284 against microgametogenesis regulators towards defining their mode or process of action.  
285 Compounds 1294<sup>31,34</sup> and ML10<sup>35</sup> have been well-established as potent inhibitors of  
286 microgametogenesis regulators Ca<sup>2+</sup>-dependent protein kinase 4 (CDPK4) and cyclic-GMP  
287 dependent protein kinase G (PKG), respectively. CDPK4 tightly regulates three processes  
288 during microgametogenesis: initiation of the first genome replication, mitotic spindle  
289 assembly and microgamete motility<sup>31</sup>. PKG has roles in the regulation of Ca<sup>2+</sup> levels and  
290 rounding up during gametogenesis<sup>36,37</sup>. The cellular phenotype of 1294<sup>31,34</sup> and ML10<sup>35</sup> have  
291 been previously reported using immunofluorescence staining of fixed microgametocytes<sup>38</sup>.  
292 Using 4D imaging, we could resolve distinct cellular phenotypes for each drug and its target  
293 (**Figure 4A-B, D-H** and **Supplementary Videos 18-24**).

294 CDPK4 inhibition by 1294<sup>31,34</sup> prevented morphological transformation from falciform to  
295 round (**Figure 4A** and **G**), DNA replication (**Figure 4F**) and microtubule polymerisation

296 (Figure 4D-E) during microgametogenesis (Supplementary Videos 18-22). On detailed  
297 inspection, 1294-treated parasites, failed to reach the maximum level of cell circularity  
298 (Figure 4G) and SiR-tubulin intensity (Figure 4A, D, E and G), indicating a role of CDPK4 in  
299 microgametocyte rounding as well as cytoskeletal rearrangement during  
300 microgametogenesis. Of note, many 1294-treated microgametocytes were observed to have  
301 egressed from the onset of activation, a probable stress-response of CDPK4 inhibition  
302 (Figure 4A). Of the population of 1294-treated microgametocytes, 50% were able to fully  
303 egress compared to the 53% of untreated microgametocytes which egressed from the host  
304 erythrocyte (Figure 4H). An incomplete egress phenotype in which falciform parasites  
305 partially emerged from the host erythrocyte was also observed, with 15% of 1294-treated  
306 parasites demonstrating this phenotype (Figure 4H). 3D data revealed the positioning of the  
307 MTOC which failed to transform to eight basal bodies (Figure 4A and Supplementary  
308 Video 19). This suggests that CDPK4 plays an early role in DNA replication, microtubule  
309 polymerisation, rounding up and host erythrocyte egress during microgametogenesis. This  
310 phenotype is consistent with published findings on 1294-treatment of *P. falciparum*<sup>38</sup> and *P.*  
311 *berghei*<sup>31</sup> gametocytes, with the exception that our morphological rounding phenotype is not  
312 observed in *P. berghei* gametocytes which are already round prior to activation. The  
313 deduced overall cellular phenotype of CDPK4 inhibition is summarised in Figure 5B.

314 PKG inhibition by ML10<sup>35</sup> was observed next, clearly demonstrating arrest of  
315 microgametocytes before cell-rounding (Figure 4B and G and Supplementary Videos 23-  
316 24), replication of DNA (Figure 4F) and microtubule polymerisation (Figure 4D and E).  
317 ML10-treated gametocytes retained a falciform morphology and a level of SiR-tubulin  
318 staining on par with that seen at the onset of gametogenesis activation (Figure 4D-E and G  
319 and Supplementary Videos 23-24). SiR-tubulin intensity was significantly lower than  
320 untreated microgametocytes at 10 minutes post-activation (Figure 4E). The host erythrocyte  
321 egress phenotype was mixed, as 50% of ML10-treated cells emerged fully, 50% failed  
322 (Figure 4Bii) and 8% partially emerged (Figure 4Bi) from the host erythrocyte (Figure 4A,

323 **H** and **Supplementary Videos 23-24**). We can deduce from these images that PKG plays a  
324 significant role in regulating MTOC transformation, axoneme nucleation and elongation, DNA  
325 replication and rounding up exhibited in microgametogenesis, as summarised in **Figure 5C**.  
326 These observations match previously reported studies on PKG during  
327 microgametogenesis<sup>38,39</sup> and does so without the laborious staining steps of fixed parasite  
328 imaging.

329

### 330 **The microgametocyte proteasome plays a crucial role in microgametogenesis**

331 To extend the cellular dissection of microgametogenesis, we next sought to test the role of  
332 the proteasome in cellular reorganisation of the microgametocyte using the drug bortezomib,  
333 a proteasome-inhibitor that has not been explored during microgametogenesis. Bortezomib  
334 is active against the asexual blood stages of *Plasmodium*<sup>40</sup> and the eukaryote and  
335 euryarchaeota proteasomes<sup>41-43</sup>. A recent study on the 20S proteasome of *S. acidocaldarius*  
336 reported bortezomib arrested cells in the midst of division<sup>44</sup>. Given the role of the  
337 proteasome in *S. acidocaldarius* cell division and interest in its use as an antimalarial drug  
338 target<sup>45</sup> we aimed to deduce the role of the proteasome in regulation of microgametogenesis  
339 DNA replication and cytoskeletal rearrangement.

340 Proteasome inhibition by bortezomib resulted in a block of microgametogenesis, preventing  
341 full cytoskeletal rearrangement (**Figure 4D, E and G**), DNA replication (**Figure 4F**) and  
342 exflagellation (**Figure 4C**). Most cells were also shown to fail to egress from the host  
343 erythrocyte, although this phenotype was mixed (**Figure 4H**). We observed inhibition of the  
344 *P. falciparum* proteasome impacted the transformation of the microgametocyte MTOC,  
345 visible as 2 small nodes of SiR-tubulin staining which remained at one pole of the parasite  
346 (**Figure 4Ci** and **Supplementary Videos 25**). The transformed MTOC was subsequently  
347 able to nucleate axonemes from one end of the parasite, but no more than 3 axonemes were  
348 formed and growth was truncated (**Figure 4Cii-iii** and **Supplementary Videos 25-28**). This  
349 perturbation to axoneme nucleation and elongation resulted in a significant decrease in SiR-

350 tubulin staining intensity (**Figure 4D, E and G**), although less significant than the decrease  
351 observed with ML10 and 1294 treatment which blocked all microtubule polymerisation.  
352 Proteasome-inhibited microgametocytes were, however, able to transform from falciform to  
353 round (**Figure 4G** and **Supplementary Videos 25-28**).

354 Bortezomib treatment also significantly reduced Vybrant™ DyeCycle™ Violet staining  
355 intensity, signifying a probable indirect inhibitory effect on DNA replication (**Figure 4F**).  
356 Additionally, we observed incomplete transformation of the MTOC which resulted in  
357 truncated formation of few axonemes from one pole of developing microgametocytes.  
358 Combined these data represent the first time that the cellular role of the proteasome during  
359 microgametogenesis has been explored. Our findings, summarised in **Figure 5C**, add further  
360 weight to bortezomib's use as a desirable antimalarial drug candidate that is able to inhibit  
361 the sexual stages of *Plasmodium* in addition to asexual replication, representing the  
362 potential to treat symptoms and block transmission with a single compound.



## 363 DISCUSSION

364 To date, detailed observation of *P. falciparum* microgametogenesis has mostly centred  
365 around fixed parasite imaging, with studies utilising immunofluorescence labelling<sup>25</sup> or  
366 electron microscopy<sup>14-16</sup>. Although these studies have been pivotal in developing our current  
367 understanding of microgametogenesis cell biology, imaging fixed parasites is limited by the  
368 extensive sample preparation steps and fails to resolve the dynamic nature of underlying  
369 cellular events. Here, we have developed a live-cell 3D fluorescence imaging approach (4D  
370 imaging) that captures the dynamics of *P. falciparum* microgametogenesis from activation to  
371 exflagellation in fine detail. Utilising widefield microscopy, commercially available stains, *in*  
372 *vitro* *P. falciparum* culture and an open-source software for analysis we present a  
373 methodological approach that will be readily utilisable for other research groups.

374 Using a combination of a cell-permeable fluorogenic probe, DNA dye and lectin we can label  
375 and observe development of microgametocyte microtubules, DNA and the host erythrocyte  
376 membrane, respectively. Whilst live fluorescence imaging is often impeded by phototoxicity,  
377 here we have devised a method that maximises the length of time-lapse image acquisition  
378 without compromising microgametocyte viability. Our approach permits the acquisition of  
379 microgametogenesis in full over two stages: early and late development, capturing spindle  
380 formation through to full axoneme development and exflagellation, respectively. Importantly,  
381 our imaging approach permits volumetric quantification of 3D data through time which we  
382 demonstrate as a powerful tool in defining drug phenotypes. Our approach is consequently  
383 applicable to future comparative studies of alternative drug treatment and *P. falciparum*  
384 transgenic cell lines to wild-type phenotypes.

385 In line with previous studies on microgametogenesis<sup>13,16</sup>, we observed the rapid production  
386 of basal bodies from a single MTOC to initiate nucleation and elongation of axonemes,  
387 simultaneously to DNA replication and egress. Coupling live fluorescence microscopy to  
388 fluorescence intensity and 3D analyses, we observed nuclei to segregate and align  
389 perpendicularly to basal bodies in the early stages of microgametogenesis. Whilst



390 synchronous segregation of developing microgametocyte genomes and basal bodies has  
391 been reported<sup>13</sup>, live fluorescence imaging provides novel insight into the positioning of the  
392 newly replicated DNA. Furthermore, we find egress involves perforation and pore formation  
393 of the host erythrocyte membrane. Previous studies have reported swelling of the host  
394 erythrocyte prior to PVM rupture and vesiculation during *P. berghei* microgametogenesis<sup>7</sup>.  
395 Here, upon erythrocyte pore formation we observed egress of developing *P. falciparum*  
396 microgametocytes to occur from a spindle pole of the microgametocyte. This suggests that  
397 there may be forces occurring from a single pole of the microgametocyte that drive egress  
398 from the host erythrocyte. Future investigation of pore-forming proteins and their role in this  
399 process may also be of relevance.

400 Additionally, we demonstrate the applicability of our workflow to the study of transmission  
401 blocking drug phenotypes. We have used the live imaging framework to elucidate the cellular  
402 phenotypes of 1294 and ML10, known inhibitors of microgametogenesis regulators CDPK4  
403 and PKG, respectively. We have also defined the proteasome as a crucial component of  
404 microgametogenesis regulation and for the first time, we define bortezomib as a powerful  
405 inhibitor of *P. falciparum* transmission. This finding points to the importance of the  
406 degradation of misfolded proteins and regulation of functional protein abundance in  
407 permitting transmission of the *Plasmodium* microgametocytes. Our approach generates  
408 reproducible and consistent phenotypes to fixed parasite studies whilst, critically, not  
409 requiring complex fixation or staining steps.

410 As drug and insecticide resistance has threatened existing antimalarial treatment strategies,  
411 there is an urgent need for novel transmission-blocking antimalarials that can be used  
412 singularly or in combination with schizonticides, killing asexual stages. Developing a full  
413 understanding of the mode of action of antimalarial drug candidates maximises the likelihood  
414 of clinical safety and future administration. Our imaging approach permits deeper  
415 understanding of this remarkable cell biology process, capturing real-time development with  
416 fluorescence which may otherwise be missed with fixed or brightfield imaging. The data

417 depicted here promises to unveil novel insights into *P. falciparum* microgametogenesis for  
418 cell biology and drug study, but the protocol is not limited to this. Cultivation of *in vitro*  
419 *Plasmodium* cultures, at any stage, permits the live microscopy of the breadth of malaria  
420 parasite development, from macrogametogenesis and asexual blood stage development to  
421 liver stages. Additional stains for intracellular organelles, parasite membranes and sex-  
422 specific proteins, with both wild-type and transgenic lines, will now be a priority for exploring  
423 so that we can shed further light on this ancient but deadly single-celled parasite.

## 424 **MATERIALS AND METHODS**

### 425 ***In vitro culture of Plasmodium falciparum***

426 *P. falciparum* NF54 strain parasites were cultured as previously described<sup>33</sup>. Asexual  
427 parasite cultures were maintained between 0.75-5% parasitaemia and 4% haematocrit using  
428 human erythrocytes (NHS National Blood Service). Erythrocytes were supplemented with 3  
429 units/ml heparin (Sigma-Aldrich). Parasites were grown in asexual parasite culture medium  
430 (RPMI 1640 with 25 mM HEPES (Life Technologies) supplemented with 50 µg/ml  
431 hypoxanthine (Sigma), 0.3 g/l L-glutamine (Sigma) and 10% human serum (Interstate Blood-  
432 Bank)). Gametocyte cultures were induced from asexual parasite cultures at 3% asexual  
433 parasitaemia and 4% haematocrit. Gametocyte culture media (RPMI 1640 with 25 mM  
434 HEPES supplemented with 150 µg/ml L-glutamine, 2.78 mg/ml sodium bicarbonate, 2 mg/ml  
435 D-glucose, 50 µg/ml hypoxanthine, 5% human serum and 5% AlbuMAX-II (Gibco)) was  
436 replaced daily until reaching maturity at day 14-post induction. All cultures were maintained  
437 at 37°C under 3% O<sub>2</sub>/5% CO<sub>2</sub>/93% N<sub>2</sub> (BOC, UK).

438 Upon reaching maturity, gametocyte viability was determined by measuring the rate of  
439 exflagellation relative to erythrocyte density. Gametocyte culture was treated with ookinete  
440 media (RPMI 1640 supplemented with 2 g/l sodium bicarbonate, 50 mg/l hypoxanthine and  
441 100 mM xanthinic acid (XA) (Sigma-Aldrich), pH adjusted to 7.4) to activate  
442 gametogenesis. Exflagellation events and erythrocyte density was counted using a  
443 haemocytometer (VWR) and Nikon Leica DC500 microscope.

### 444 ***Staining and Treating Live P. falciparum Gametocytes***

445 For live-cell fluorescence imaging, samples of mature gametocyte culture (> 0.3%  
446 exflagellation) were stained with 500 nM SiR-tubulin (Spirochrome) for 3 hours at 37°C.  
447 Samples were additionally stained with 5 µg/ml wheat germ agglutinin (WGA) conjugated to  
448 AlexaFluor488 (Invitrogen) and 500 nM Vybrant™ DyeCycle™ Violet for 30 minutes at 37°C.

449 Stained samples were protected from light and strictly maintained at 37°C, to prevent  
450 premature activation, until imaging.

451 Samples were treated with 10 µM 1294<sup>46</sup>, 10 µM ML10<sup>35</sup>, 25 µM Bortezomib or DMSO and  
452 normalised to 0.25% DMSO for 3 hours at 37°C, before imaging.

### 453 ***Imaging Live Microgametogenesis by Widefield Microscopy***

454 Wells of an Ibidi 8-well µ-Slide were pre-treated with 140 µl ookinete medium and slides  
455 were pre-positioned on the microscope stage. To activate gametogenesis, 6 µL of the  
456 stained gametocytes, equating to ~30 million total erythrocytes, was added directly to  
457 ookinete media-treated wells at room temperature (21°C). Samples were imaged with a  
458 Prime 95B sCMOS camera (photometrics) on a Nikon Ti2-E widefield microscope using x  
459 100 Plan Apo 1.4 numerical aperture (NA) oil objective with NIS Elements v4.20 software.  
460 SiR-Tubulin, WGA-488 and Vybrant™ DyeCycle™ Violet staining were imaged with a Cy5,  
461 GFP and DAPI filter set. The triggered multi-wavelength LED and static quad band filter  
462 cube was used in acquisition through Z and between wavelengths.

463 Early stages of microgametogenesis (0-10 minutes) were acquired as 3D datasets through  
464 time at 'no delay' and with 34 ms exposure time. Z-stacks were acquired at 0.2 µm steps  
465 from above and below the cell with a Piezo driven stage. Acquisition was alternated between  
466 brightfield and fluorescence to minimise phototoxicity and subsequently prolong parasite  
467 viability. Exflagellation was captured as 2D (single z-slice) datasets, acquiring with no delay  
468 between frames.

### 469 ***Image Analysis***

470 The open-source bioimage analysis software Icy<sup>47</sup> was used to analyse all time-lapse  
471 datasets. All 3D datasets are depicted here as 2D maximum intensity projections. Early  
472 developmental stages of microgametogenesis, acquired through t and z, were deconvolved  
473 using a custom-made Protocol in Icy. The Protocol is attached in the **Additional**  
474 **Supplementary Information**. Within the Protocol, a Sequence File Batch loop locates the

475 3D+t files from which a channel of interest is extracted. The selected channel of each time  
476 frame is processed as an individual 3D stack. The metadata of each stack is read and used  
477 as an input for the EpiDEMIC deconvolution bloc (Epifluorescence Deconvolution  
478 MICroscopy), a blind (i.e. without Point Spread Function (PSF) knowledge) deconvolution  
479 method for widefield fluorescence microscopy 3D data<sup>48</sup>. All timelapses were deconvolved  
480 over 50 iterations and 2 loops.

481 All 2D timelapse data and 3D data depicted as 2D maximum intensity projections or 3D  
482 sectioned views were created using Icy. To quantify SiR-tubulin and Vybrant™ DyeCycle™  
483 Violet intensity, egress phenotypes and cell circularity, raw 3D data was converted to 2D  
484 maximum intensity projections in NIS Elements v4.20 prior to analysis. Egress phenotypes  
485 were quantified by manual observation. To measure the circularity and staining intensity of  
486 individual cells, each cell was defined as a custom region of interest. The SiR-tubulin and  
487 Vybrant™ DyeCycle™ Violet staining intensity of each individual cell was quantified using  
488 the time-measurement function in NIS Elements v4.20 and is reported in arbitrary units. The  
489 circularity of each cell was measured using the Automated Measurement feature in NIS  
490 Elements v4.20. Circularity is reported here as shape measure values from 0-1 derived from  
491 the area and perimeter of each cell, with higher values representing shapes of increasing  
492 circularity and circles being characterised as a value of 1. All graphical and statistical data  
493 was analysed with GraphPad Prism version 8.0.

494 **REFERENCES**

- 495 1. Josling, G.A. & Llinás, M. Sexual development in Plasmodium parasites: knowing  
496 when it's time to commit. *Nat Rev Microbiol* **13**, 573-87 (2015).
- 497 2. Dixon, M.W., Dearnley, M.K., Hanssen, E., Gilberger, T. & Tilley, L. Shape-shifting  
498 gametocytes: how and why does *P. falciparum* go banana-shaped? *Trends Parasitol*  
499 **28**, 471-8 (2012).
- 500 3. Dixon, M.W.A. & Tilley, L. Plasmodium falciparum goes bananas for sex. *Mol*  
501 *Biochem Parasitol* **244**, 111385 (2021).
- 502 4. Billker, O., Shaw, M.K., Margos, G. & Sinden, R.E. The roles of temperature, pH and  
503 mosquito factors as triggers of male and female gametogenesis of Plasmodium  
504 berghei in vitro. *Parasitology* **115 ( Pt 1)**, 1-7 (1997).
- 505 5. Andreadaki, M. et al. Sequential Membrane Rupture and Vesiculation during  
506 Plasmodium berghei Gametocyte Egress from the Red Blood Cell. *Scientific Reports*  
507 **8**, 3543 (2018).
- 508 6. Guttery, D.S., Roques, M., Holder, A.A. & Tewari, R. Commit and Transmit:  
509 Molecular Players in Plasmodium Sexual Development and Zygote Differentiation.  
510 *Trends in Parasitology* **31**, 676-685 (2015).
- 511 7. Andreadaki, M. et al. Sequential Membrane Rupture and Vesiculation during  
512 Plasmodium berghei Gametocyte Egress from the Red Blood Cell. *Sci Rep* **8**, 3543  
513 (2018).
- 514 8. Ponzi, M. et al. Egress of Plasmodium berghei gametes from their host erythrocyte is  
515 mediated by the MDV-1/PEG3 protein. *Cell Microbiol* **11**, 1272-88 (2009).
- 516 9. Talman, A.M. et al. PbGEST mediates malaria transmission to both mosquito and  
517 vertebrate host. *Mol Microbiol* **82**, 462-74 (2011).
- 518 10. Deligianni, E. et al. Critical role for a stage-specific actin in male exflagellation of the  
519 malaria parasite. *Cell Microbiol* **13**, 1714-30 (2011).
- 520 11. Deligianni, E. et al. A perforin-like protein mediates disruption of the erythrocyte  
521 membrane during egress of Plasmodium berghei male gametocytes. *Cell Microbiol*  
522 **15**, 1438-55 (2013).
- 523 12. Olivieri, A. et al. Distinct properties of the egress-related osmiophilic bodies in male  
524 and female gametocytes of the rodent malaria parasite Plasmodium berghei. *Cell*  
525 *Microbiol* **17**, 355-68 (2015).
- 526 13. Sinden, R.E., Canning, E.U., Bray, R.S. & Smalley, M.E. Gametocyte and gamete  
527 development in Plasmodium falciparum. *Proc R Soc Lond B Biol Sci* **201**, 375-99  
528 (1978).
- 529 14. Billker, O. et al. Azadirachtin disrupts formation of organised microtubule arrays  
530 during microgametogenesis of Plasmodium berghei. *J Eukaryot Microbiol* **49**, 489-97  
531 (2002).
- 532 15. Sinden, R.E., Canning, E.U. & Spain, B. Gametogenesis and fertilization in  
533 Plasmodium yoelii nigeriensis: a transmission electron microscope study. *Proc R Soc*  
534 *Lond B Biol Sci* **193**, 55-76 (1976).
- 535 16. Sinden, R.E., Talman, A., Marques, S.R., Wass, M.N. & Sternberg, M.J. The  
536 flagellum in malarial parasites. *Curr Opin Microbiol* **13**, 491-500 (2010).
- 537 17. Sinden, R.E. Malaria, sexual development and transmission: retrospect and  
538 prospect. *Parasitology* **136**, 1427-34 (2009).
- 539 18. Bell, A. Microtubule Inhibitors as Potential Antimalarial Agents. *Parasitology Today*  
540 **14**, 234-240 (1998).
- 541 19. Rawlings, D.J. et al.  $\alpha$ -Tubulin II is a male-specific protein in Plasmodium falciparum.  
542 *Molecular and Biochemical Parasitology* **56**, 239-250 (1992).
- 543 20. Angrisano, F., Tan, Y.H., Sturm, A., McFadden, G.I. & Baum, J. Malaria parasite  
544 colonisation of the mosquito midgut--placing the Plasmodium ookinete centre stage.  
545 *Int J Parasitol* **42**, 519-27 (2012).



- 546 21. Ruecker, A. et al. A male and female gametocyte functional viability assay to identify  
547 biologically relevant malaria transmission-blocking drugs. *Antimicrob Agents*  
548 *Chemother* **58**, 7292-302 (2014).
- 549 22. Bertiaux, E. et al. Expansion microscopy provides new insights into the cytoskeleton  
550 of malaria parasites including the conservation of a conoid. *PLoS Biol* **19**, e3001020  
551 (2021).
- 552 23. Sinden, R.E. Gametocytogenesis of *Plasmodium falciparum* in vitro: an electron  
553 microscopic study. *Parasitology* **84**, 1-11 (1982).
- 554 24. Ashdown, G.W. et al. A machine learning approach to define antimalarial drug action  
555 from heterogeneous cell-based screens. *bioRxiv* (2019).
- 556 25. Delves, M.J. et al. A high throughput screen for next-generation leads targeting  
557 malaria parasite transmission. *Nat Commun* **9**, 3805 (2018).
- 558 26. Geoghegan, N.D. et al. 4D analysis of malaria parasite invasion offers insights into  
559 erythrocyte membrane remodeling and parasitophorous vacuole formation. *Nature*  
560 *Communications* **12**, 3620 (2021).
- 561 27. Zeeshan, M. et al. Protein phosphatase 1 regulates atypical mitotic and meiotic  
562 division in *Plasmodium* sexual stages. *Communications Biology* **4**, 760 (2021).
- 563 28. Wall, R.J. et al. *Plasmodium* APC3 mediates chromosome condensation and  
564 cytokinesis during atypical mitosis in male gametogenesis. *Sci Rep* **8**, 5610 (2018).
- 565 29. Lukinavičius, G. et al. Fluorogenic probes for live-cell imaging of the cytoskeleton.  
566 *Nature Methods* **11**, 731-733 (2014).
- 567 30. Dubois, J. et al. Fluorescent and biotinylated analogues of docetaxel: Synthesis and  
568 biological evaluation. *Bioorganic & Medicinal Chemistry* **3**, 1357-1368 (1995).
- 569 31. Fang, H. et al. Multiple short windows of calcium-dependent protein kinase 4 activity  
570 coordinate distinct cell cycle events during *Plasmodium* gametogenesis. *eLife* **6**,  
571 e26524 (2017).
- 572 32. Hitz, E., Balestra, A.C., Brochet, M. & Voss, T.S. PfMAP-2 is essential for male  
573 gametogenesis in the malaria parasite *Plasmodium falciparum*. *Scientific Reports* **10**,  
574 11930 (2020).
- 575 33. Delves, M.J. et al. Routine in vitro culture of *P. falciparum* gametocytes to evaluate  
576 novel transmission-blocking interventions. *Nat Protoc* **11**, 1668-80 (2016).
- 577 34. Doggett, J.S., Ojo, K.K., Fan, E., Maly, D.J. & Van Voorhis, W.C. Bumped kinase  
578 inhibitor 1294 treats established *Toxoplasma gondii* infection. *Antimicrob Agents*  
579 *Chemother* **58**, 3547-9 (2014).
- 580 35. Baker, D.A. et al. A potent series targeting the malarial cGMP-dependent protein  
581 kinase clears infection and blocks transmission. *Nat Commun* **8**, 430 (2017).
- 582 36. McRobert, L. et al. Gametogenesis in Malaria Parasites Is Mediated by the cGMP-  
583 Dependent Protein Kinase. *PLOS Biology* **6**, e139 (2008).
- 584 37. Bennink, S., Kiesow, M.J. & Pradel, G. The development of malaria parasites in the  
585 mosquito midgut. *Cellular Microbiology* **18**, 905-918 (2016).
- 586 38. Yahiya, S. et al. *Plasmodium falciparum* protein Pfs16 is a target for transmission-  
587 blocking antimalarial drug development. *bioRxiv*, 2021.06.14.448287 (2021).
- 588 39. McRobert, L. et al. Gametogenesis in malaria parasites is mediated by the cGMP-  
589 dependent protein kinase. *PLoS Biol* **6**, e139 (2008).
- 590 40. Reynolds, J.M., El Bissati, K., Brandenburg, J., Günzl, A. & Mamoun, C.B.  
591 Antimalarial activity of the anticancer and proteasome inhibitor bortezomib and its  
592 analog ZL3B. *BMC clinical pharmacology* **7**, 13-13 (2007).
- 593 41. Adams, J. et al. Proteasome Inhibitors: A Novel Class of Potent and Effective  
594 Antitumor Agents. *Cancer Research* **59**, 2615-2622 (1999).
- 595 42. Chen, D., Frezza, M., Schmitt, S., Kanwar, J. & Dou, Q.P. Bortezomib as the first  
596 proteasome inhibitor anticancer drug: current status and future perspectives. *Curr*  
597 *Cancer Drug Targets* **11**, 239-53 (2011).
- 598 43. Fu, X. et al. Ubiquitin-Like Proteasome System Represents a Eukaryotic-Like  
599 Pathway for Targeted Proteolysis in Archaea. *mBio* **7**(2016).

- 600 44. Tarrason Risa, G. et al. The proteasome controls ESCRT-III-mediated cell division in  
601 an archaeon. *Science* **369**, eaaz2532 (2020).  
602 45. Xie, S.C. et al. Target Validation and Identification of Novel Boronate Inhibitors of the  
603 Plasmodium falciparum Proteasome. *J Med Chem* **61**, 10053-10066 (2018).  
604 46. Ojo, K.K. et al. A specific inhibitor of PfCDPK4 blocks malaria transmission:  
605 chemical-genetic validation. *J Infect Dis* **209**, 275-84 (2014).  
606 47. de Chaumont, F. et al. Icy: an open bioimage informatics platform for extended  
607 reproducible research. *Nat Methods* **9**, 690-6 (2012).  
608 48. Soulez, F., Denis, L., Tourneur, Y. & Thiébaud, É. Blind deconvolution of 3D data in  
609 wide field fluorescence microscopy. in *International Symposium on Biomedical*  
610 *Imaging CDRM* (2012).

611

## 612 **ACKNOWLEDGEMENTS**

613 We thank Irene Garcia-Barbazan, Eliana Real and David Grimson for assisting with parasite  
614 culture and for sharing expert transmission advice. Additional thanks to other members of  
615 the Baum lab for helpful discussions and experimental support, with particular thanks to  
616 Thomas C. A. Blake for assistance in data production. We also thank Robert E. Sinden for  
617 valuable discussions about the biology of microgametogenesis. Finally, we thank  
618 collaborators in the Baker lab and Van Voorhis lab for their generous donation of  
619 microgametogenesis inhibitors 1294 and ML10, respectively.

620

## 621 **AUTHOR CONTRIBUTIONS**

622 S.Y., S.J., G.A. and J.B. designed experiments. S.Y., S.J., H.S., D.G. and G.A. performed  
623 and analysed experiments. S.Y., S.J., M.T.F, A.C, F.D and E.R. cultured *P. falciparum*.  
624 D.C.A.G designed the Icy batch deconvolution protocol.

625

## 626 **COMPETING INTERESTS**

627 The authors declare no competing interests.

628

## 629 **FUNDING**



630 S.Y. is supported by a Ph.D. studentship from an EPSRC Doctoral Training Partnership  
631 award (Grant EP/R512540/1) to Imperial College London. JB was supported by an  
632 Investigator Award from Wellcome (100993/Z/13/Z). This work was funded in part by an  
633 award to JB from the Bill and Melinda Gates Foundation (OPP1181199). The Facility for  
634 Imaging by Light Microscopy (FILM) at Imperial College London is part-supported by funding  
635 from the Wellcome Trust (grant 104931/Z/14/Z) and BBSRC (grant BB/L015129/1)

636 **FIGURES**

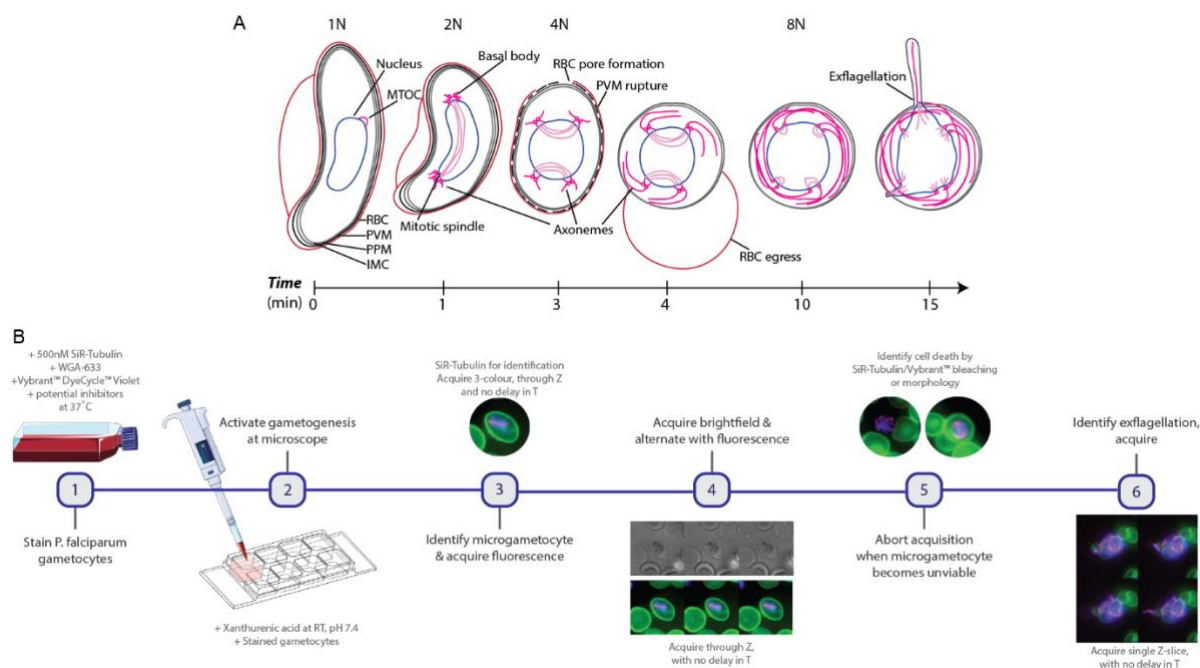

637

638 **Figure 1. *P. falciparum* microgametogenesis and our live cell imaging approach**

639 **(A)** Details of the cell biological transformations occurring during microgametogenesis from  
 640 activation at t = 0 minutes to exflagellation at t = 15 minutes. At t = 0 minutes,  
 641 microgametocytes start with a falciform morphology and an in-tact 4-layer membrane,  
 642 comprised of the red blood cell (RBC) membrane, parasitophorous vacuole membrane  
 643 (PVM), parasitophorous plasma membrane (PPM) and inner membrane complex (IMC).  
 644 Following the first round of DNA replication (1n-2n) at t = 1 minute, the microtubule  
 645 organising centre (MTOC) transforms to two tetrads of basal bodies joined by a mitotic  
 646 spindle. Further replication of DNA (2n-4n, 4n-8n) occurs after ~ t = 3-4 minutes,  
 647 simultaneously to the separation of basal bodies and egress. During egress, PVM rupture  
 648 precedes erythrocyte egress (inside-out-mechanism) and parasites egress from an  
 649 erythrocyte pore. Axonemes nucleate from basal bodies following the first DNA replication at  
 650 t = 1 min and elongate from t = 1-15 min, coiling around the parasite cell body. At 15 minutes  
 651 post-activation, axonemes emerge attached to a haploid genome as microgametes, in the  
 652 process of exflagellation. **(B)** The workflow of live gametocyte staining and fluorescence  
 653 microscopy of microgametogenesis. *P. falciparum* NF54 gametocytes are stained with SiR-  
 654 Tubulin, WGA-633 and Vybrant™ DyeCycle™ Violet at 37°C, at which point inhibitors of  
 655 microgametogenesis may be added. Stained gametocytes are subsequently activated with  
 656 ookinete medium in pre-positioned imaging slides at RT. SiR-tubulin stained mitotic spindles  
 657 are used to identify microgametogenesis events, which are continually imaged through T  
 658 and Z, alternating between brightfield and fluorescence to minimise phototoxicity. When

659 parasites are deemed unviable based on photobleaching or morphology, exflagellation  
660 events are captured as single Z-slice timelapses through T.

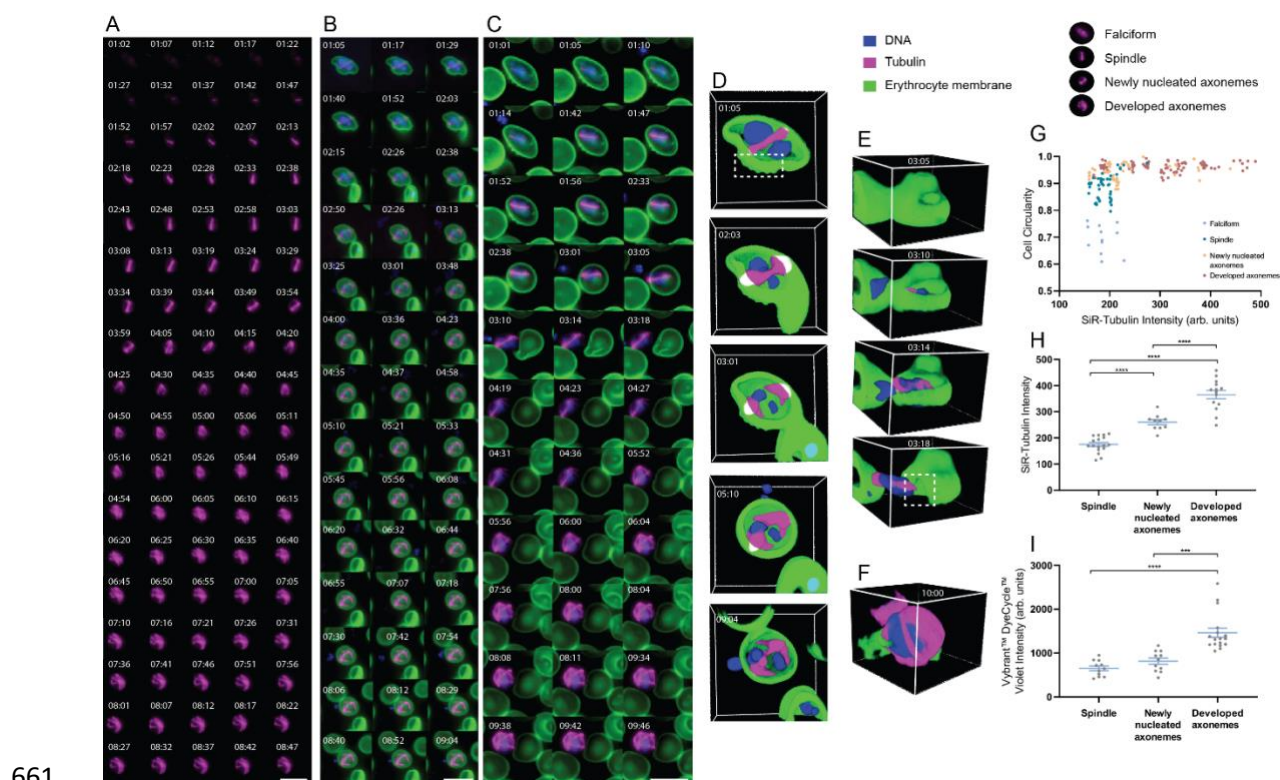

661

662 **Figure 2. Tubulin dynamics, egress and DNA replication during *P. falciparum***  
 663 **microgametogenesis**

664 Still timelapses of microgametocytes stained with (A) SiR-Tubulin (magenta) only and (B-E)  
 665 a combination of SiR-Tubulin (magenta), WGA-488 (green) and Vybrant™ DyeCycle™  
 666 Violet (blue) in the early developmental stages of microgametogenesis. See **Supplementary**  
 667 **Videos 1, 2 and 3** for corresponding timelapses of A-C. Microtubule staining (magenta)  
 668 portrays formation of mitotic spindles, basal bodies and axonemes. (B-E) Timelapse data  
 669 depicting DNA replication (blue), microtubule dynamics (magenta), host erythrocyte egress  
 670 and morphological transformations (host erythrocyte membrane, green). (D) Erythrocyte  
 671 membrane perforation (white dashed box), (E) erythrocyte pore formation (white dashed  
 672 box) and (F) axoneme coiling are visible in 3D sectioned images. (G) A graph plotted to  
 673 show cell circularity and SiR-Tubulin intensity (arbitrary units), with each plot representing  
 674 individual cells of a given developmental stage; falciform ( $n = 12$ ), spindle ( $n = 46$ ), newly  
 675 nucleated axonemes ( $n = 48$ ) and developed axonemes ( $n = 82$ ). Representative images of  
 676 developmental stages are above the plots. (H) SiR-Tubulin intensity (arbitrary units) of  
 677 individual cells from distinct developmental stages; spindle ( $n = 17$ ), newly nucleated  
 678 axonemes ( $n = 10$ ) and developed axonemes ( $n = 14$ ). (I) Vybrant™ DyeCycle™ Violet  
 679 intensity (arbitrary units) quantified in distinct developmental stages; spindle ( $n = 11$ ), newly  
 680 nucleated axonemes ( $n = 11$ ) and developed axonemes ( $n = 17$ ). Significant differences in  
 681 stain intensities between developmental stages was calculated with an unpaired, two-tailed t

682 test (\*\* $p < .001$ , \*\*\*\* $p < .0001$ ). **A-C** 2D maximum intensity projection of 3D data, scale  
683 bars = 10  $\mu\text{m}$ . Individual channels of **B** and **C** can be found in [Figure S1A](#) and [Figure S1B](#),  
684 respectively. **D-E** 3D sectioned views frames depicted in **B-C**, respectively. **A-E** Time is  
685 depicted as minutes and seconds (mm:ss). All imaging data depicted reflect observations  
686 from >10 biological replicates.

687



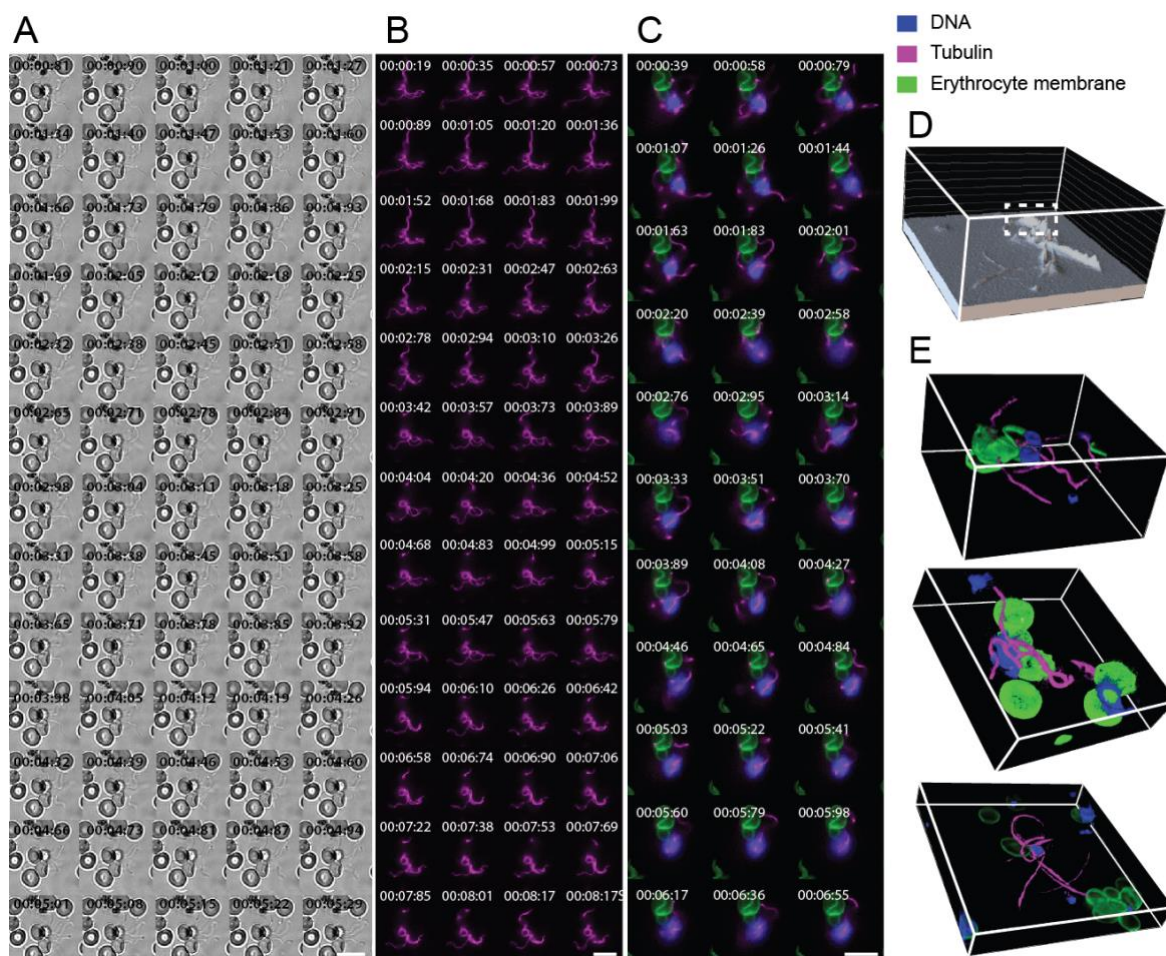

688

689 **Figure 3. Exflagellation of *P. falciparum* microgametes**

690 2D timelapse stills of exflagellation imaged by (A) brightfield and (B, C & E) fluorescence  
 691 microscopy. See **Supplementary Videos 8, 10 and 15** for corresponding timelapses of A-C.  
 692 (B-C) SiR-Tubulin-stained axonemes (magenta) emerge from the parasite cell as  
 693 microgametes. (C) Emerging microgametes carry a 1n genome from the newly replicated 8n  
 694 genome (blue) and adhere to neighbouring erythrocytes (green). (D) 3D intensity plot of SiR-  
 695 Tubulin staining intensity to reveal dense regions (white dashed line) of axoneme overlap.  
 696 (E) 3D-sectioned views of exflagellating microgametes, see **Supplementary Video 17** for a  
 697 3D rotated view. A-C Time is depicted as minutes, seconds and milliseconds (mm:ss.ms).  
 698 Scale bars = 10  $\mu$ m. Individual channels of C can be found in **Figure S1E**. All data depicted  
 699 reflect observations from >10 biological replicates.

700

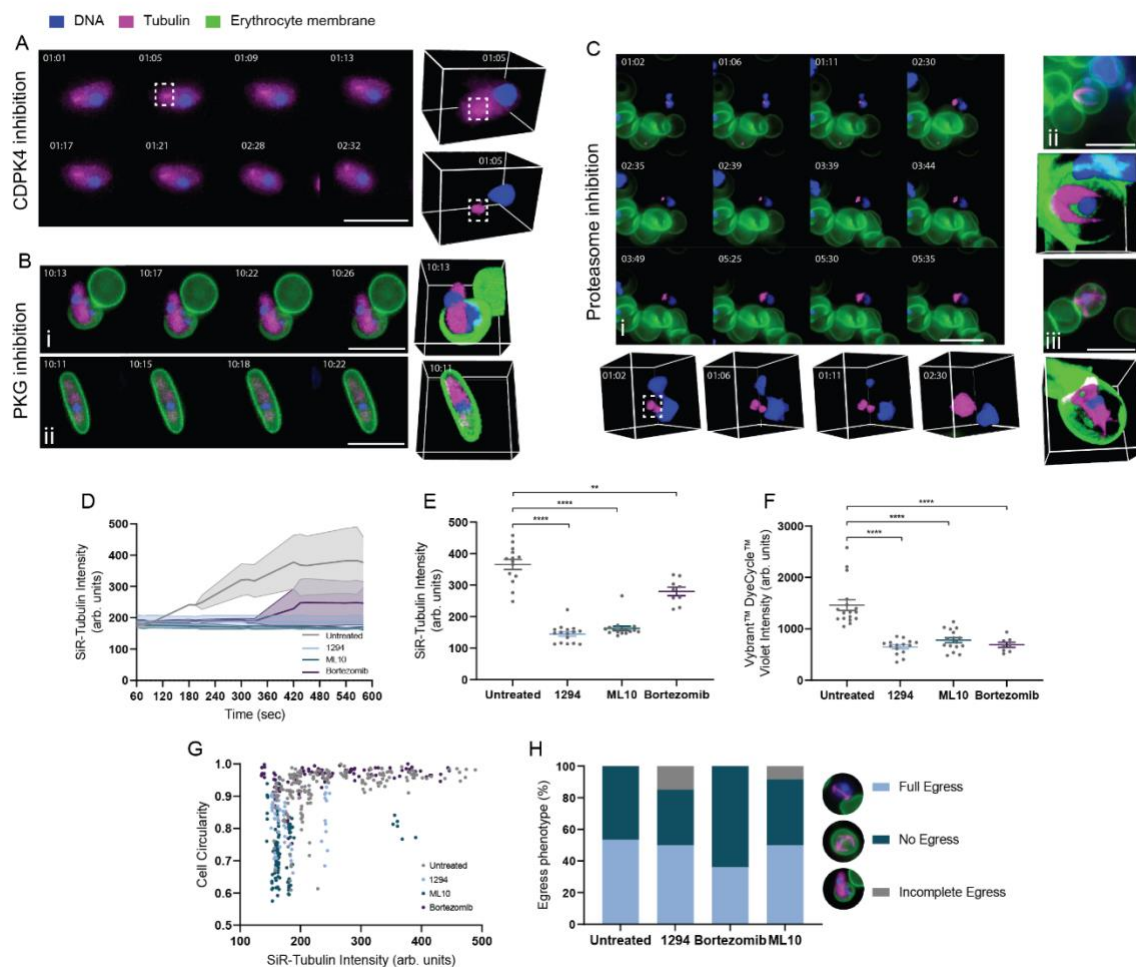

701

702 **Figure 4. Cellular phenotypes of PKG, CDPK4 and proteasome-inhibited parasites**

703 Cellular phenotypes upon inhibition of *P. falciparum* (A) CDPK4, (B) PKG and (C)  
 704 proteasome by 1294, ML10 and bortezomib, respectively, during microgametogenesis.  
 705 Perturbations to microtubule rearrangement (SiR-Tubulin, magenta), the host erythrocyte  
 706 (WGA, green) and DNA replication (Vybrant™ DyeCycle™ Violet, blue) are shown as 2D  
 707 maximum intensity projections of 3D data and alongside 3D sectioned views. Individual  
 708 channels can be found in **Figure S3**. (A) Failed DNA replication, cytoskeletal rearrangement  
 709 and MTOC (white dashed line) transformation under 1294-treatment are shown. Stress  
 710 induced egress prior to activation is also depicted. See **Supplementary Video 19** for the  
 711 corresponding timelapse. (B) The failed DNA replication and cytoskeletal rearrangement due  
 712 to PKG inhibition by ML10 is shown. Mixed egress phenotypes were observed, including (i)  
 713 incomplete and (ii) failed egress. See corresponding timelapses in **Supplementary Videos**  
 714 **23-24**. (C) Perturbations to (i) MTOC transformation (white dashed line) and (ii-iii)  
 715 formation of two-three truncated axonemes resulting from proteasome inhibition are shown. See  
 716 **Supplementary Videos 25, 27** and **28** for the corresponding timelapses. (D) A continuum of  
 717 SiR-tubulin staining intensity (arbitrary units) in untreated ( $n = 4$ ), 1294 ( $n = 3$ ), ML10 ( $n = 3$ )

718 and bortezomib ( $n = 6$ ) treated parasites. **(E)** SiR-tubulin staining (arbitrary units) at 10  
719 minutes post-activation under different treatments. Untreated ( $n = 14$ ), 1294 ( $n = 16$ ), ML10  
720 ( $n = 16$ ), bortezomib ( $n = 9$ ). Significance was calculated with an unpaired, two-tailed t test;  
721 \*\*  $p < .01$ , \*\*\*\*  $p < .0001$ . **(F)** Vybrant™ DyeCycle™ Violet staining (arbitrary units) was  
722 significantly reduced (unpaired, two-tailed t test; \*\*\*\*  $p < .0001$ ) at 10 minutes post-activation  
723 under different treatments. Untreated ( $n = 17$ ), 1294 ( $n = 15$ ), ML10 ( $n = 9$ ), bortezomib ( $n =$   
724 16). **(G)** A graph depicting the cell circularity and SiR-tubulin staining intensity of individual  
725 cells across the entirety of microgametogenesis under varying treatments. Untreated ( $n =$   
726 188), 1294 ( $n = 58$ ), ML10 ( $n = 106$ ), bortezomib ( $n = 105$ ). **(H)** Percentage egress at 10  
727 minutes post-activation under different treatments was quantified, with distinct egress  
728 phenotypes depicted beside the stacked bar graph. Untreated ( $n = 58$ ), 1294 ( $n = 20$ ), ML10  
729 ( $n = 25$ ), bortezomib ( $n = 24$ ). All imaging data depicted reflect observations from >3  
730 biological replicates.

731



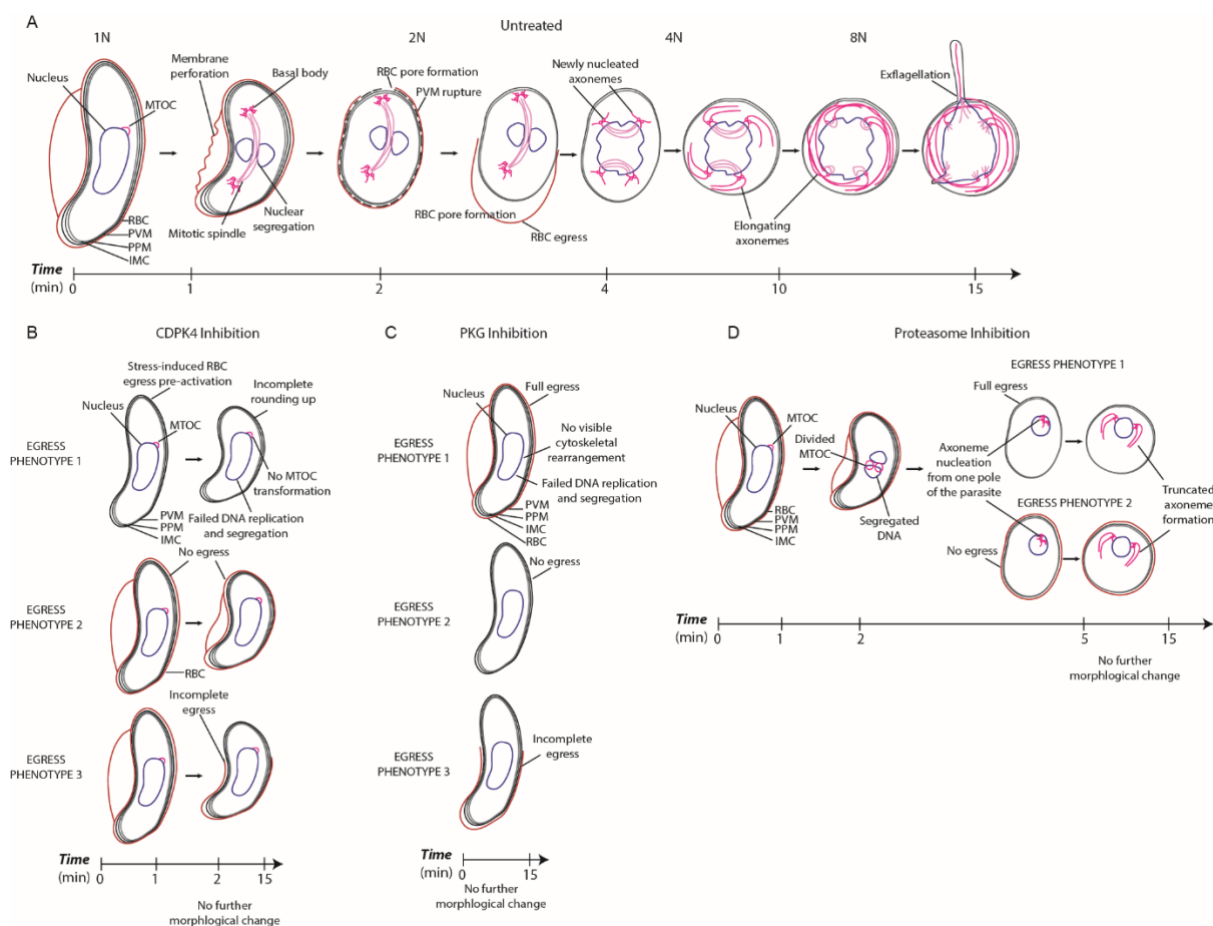

732

733 **Figure 5. Novel insights into microgametogenesis with and without drug inhibition**

734 Schematic diagrams showing the transformations observed by 4D live-cell fluorescence  
 735 microscopy of microgametogenesis. The observations depicted are of **(A)** untreated, **(B)**  
 736 CDPK4-inhibited, **(C)** PKG-inhibited and proteasome-inhibited microgametocytes, treated  
 737 with DMSO, 1294, ML10 and bortezomib, respectively. **(A)** Perforation and pore-formation of  
 738 the host cell membrane was found to occur during egress of untreated microgametocytes,  
 739 which ejected from a single spindle pole of the parasite. Nuclear segregation was found to  
 740 occur perpendicularly to the mitotic spindle. **(B)** CPDK4 inhibition prevented MTOC  
 741 transformation and full rounding-up with three distinct egress phenotypes: 1) stress-induced  
 742 egress prior to activation, 2) no egress and 3) incomplete egress. **(C)** Inhibition of PKG  
 743 prevented rounding-up and any microtubule polymerisation, with 3 distinct egress  
 744 phenotypes: 1) no egress, 2) full egress and 3) incomplete egress. **(D)** Proteasome inhibition  
 745 resulted in abhorrent MTOC division and some nuclear segregation, with few truncated  
 746 axonemes nucleating from one pole of the transformed parasite. Rounding-up of  
 747 proteasome-inhibited parasites was observed.
